# Supplementary material
Source: PubMed Central journal article supplement (PMC7415518)
Supplement: NIHMS1590542-supplement-316448_Major_Resources_Table.pdf [file NIHMS1590542-supplement-316448_Major_Resources_Table.pdf]

**Major Resources Table****Animals (in vivo studies)**

| Species | Vendor or Source            | Background Strain | Sex  |
|---------|-----------------------------|-------------------|------|
| Mouse   | National Institute on Aging | C57BL/6           | Male |

**Antibodies**

| Target antigen          | Vendor or Source  | Catalog #  | Working concentration | Persistent ID / URL                                                                                                                                                                                                   |
|-------------------------|-------------------|------------|-----------------------|-----------------------------------------------------------------------------------------------------------------------------------------------------------------------------------------------------------------------|
| anti-CD45               | Invitrogen        | 48045182   | 1:100                 | <a href="https://www.thermofisher.com/antibody/product/CD45-Antibody-clone-30-F11-Monoclonal/48-0451-82">https://www.thermofisher.com/antibody/product/CD45-Antibody-clone-30-F11-Monoclonal/48-0451-82</a>           |
| anti-CD4                | BioLegend         | 100516     | 1:100                 | <a href="https://www.biolegend.com/en-us/products/apc-anti-mouse-cd4-antibody-477">https://www.biolegend.com/en-us/products/apc-anti-mouse-cd4-antibody-477</a>                                                       |
| anti-TCR $\beta$        | BioLegend         | 109228     | 1:100                 | <a href="https://www.biolegend.com/en-us/products/percpyanine55-anti-mouse-tcr-beta-chain-antibody-5603">https://www.biolegend.com/en-us/products/percpyanine55-anti-mouse-tcr-beta-chain-antibody-5603</a>           |
| anti-TCR $\gamma\delta$ | BioLegend         | 118124     | 1:100                 | <a href="https://www.biolegend.com/en-us/products/pe-cy7-anti-mouse-tcr-gamma-delta-antibody-7822">https://www.biolegend.com/en-us/products/pe-cy7-anti-mouse-tcr-gamma-delta-antibody-7822</a>                       |
| anti-CD3 $\epsilon$     | BioLegend         | 100362     | 1:100                 | <a href="https://www.biolegend.com/en-us/products/apc-fire-750-anti-mouse-cd3epsilon-antibody-13559">https://www.biolegend.com/en-us/products/apc-fire-750-anti-mouse-cd3epsilon-antibody-13559</a>                   |
| anti-CD8 $\alpha$       | BioLegend         | 100734     | 1:100                 | <a href="https://www.biolegend.com/en-us/products/percpyanine55-anti-mouse-cd8a-antibody-4255">https://www.biolegend.com/en-us/products/percpyanine55-anti-mouse-cd8a-antibody-4255</a>                               |
| anti-CD19               | BioLegend         | 115520     | 1:100                 | <a href="https://www.biolegend.com/en-us/products/pe-cy7-anti-mouse-cd19-antibody-1907">https://www.biolegend.com/en-us/products/pe-cy7-anti-mouse-cd19-antibody-1907</a>                                             |
| anti-NK-1.1             | BioLegend         | 108753     | 1:100                 | <a href="https://www.biolegend.com/en-us/search-results/brilliant-violet-605-anti-mouse-nk-1-1-antibody-8665">https://www.biolegend.com/en-us/search-results/brilliant-violet-605-anti-mouse-nk-1-1-antibody-8665</a> |
| anti-CD11b              | Invitrogen        | 53-0112-82 | 1:100                 | <a href="https://www.thermofisher.com/antibody/product/CD11b-Antibody-clone-M1-70-Monoclonal/53-0112-82">https://www.thermofisher.com/antibody/product/CD11b-Antibody-clone-M1-70-Monoclonal/53-0112-82</a>           |
| anti-Foxp3              | eBioscience       | 12-4774-42 | 1:20                  | <a href="https://www.thermofisher.com/antibody/product/FOXP3-Antibody-clone-150D-E4-Monoclonal/12-4774-42">https://www.thermofisher.com/antibody/product/FOXP3-Antibody-clone-150D-E4-Monoclonal/12-4774-42</a>       |
| anti-IL-17A             | BioLegend         | 506904     | 1:33                  | <a href="https://www.biolegend.com/en-us/products/pe-anti-mouse-il-17a-antibody-1633">https://www.biolegend.com/en-us/products/pe-anti-mouse-il-17a-antibody-1633</a>                                                 |
| anti-Muc2               | Novus Biologicals | NBP1-31231 | 1:250                 | <a href="https://www.novusbio.com/products/muc2-antibody_nbp1-31231">https://www.novusbio.com/products/muc2-antibody_nbp1-31231</a>                                                                                   |
| anti-Iba1               | abcam             | ab225260   | 1:200                 | <a href="https://www.abcam.com/iba1-antibody-epr16588-alexa-fluor-488-ab225260.html">https://www.abcam.com/iba1-antibody-epr16588-alexa-fluor-488-ab225260.html</a>                                                   |
| anti-P2RY12             | BioLegend         | 848004     | 1:200                 | <a href="https://www.biolegend.com/en-us/products/pe-anti-p2ry12-antibody-15400">https://www.biolegend.com/en-us/products/pe-anti-p2ry12-antibody-15400</a>                                                           |
